# Supplementary material
Source: HighWire-hosted journal article supplement (https://bmjopen.bmj.com/content/7/12/e018483)
Supplement: inline-supplementary-material-1 [file inline-supplementary-material-1.pdf]

Table S1 ICD-9-CM codes used to identify migraine, renal outcome, and comorbid conditions.

| Diseases                 | Corresponding ICD-9-CM codes                                                                                                                                                                                                                                                                                                                                                                                                                                                                                                                                                                                                                           | A-code |
|--------------------------|--------------------------------------------------------------------------------------------------------------------------------------------------------------------------------------------------------------------------------------------------------------------------------------------------------------------------------------------------------------------------------------------------------------------------------------------------------------------------------------------------------------------------------------------------------------------------------------------------------------------------------------------------------|--------|
| Migraine                 | 346.x                                                                                                                                                                                                                                                                                                                                                                                                                                                                                                                                                                                                                                                  |        |
| Unspecified              | 346.90–346.91                                                                                                                                                                                                                                                                                                                                                                                                                                                                                                                                                                                                                                          | A229   |
| Without aura             | 346.10–346.11                                                                                                                                                                                                                                                                                                                                                                                                                                                                                                                                                                                                                                          |        |
| With aura                | 346.00–346.01                                                                                                                                                                                                                                                                                                                                                                                                                                                                                                                                                                                                                                          |        |
| Chronic kidney disease   | 016.00, 095.40, 189.00, 189.90, 223.00, 236.91, 250.40, 271.40, 274.10, 283.11, 403.01, 403.11, 403.91, 404.02, 404.12, 404.92, 404.03, 404.13, 404.93, 440.10, 442.10, 447.30, 572.40, 580.00, 580.40, 580.80, 580.81, 580.89, 580.90, 581.00, 581.10, 581.20, 581.30, 581.80, 581.81, 581.89, 581.90, 582.00, 582.10, 582.20, 582.40, 582.80, 582.80, 582.89, 582.90, 583.00, 583.10, 583.20, 583.40, 583.60, 583.70, 583.80, 583.81, 583.89, 583.90, 584.00, 584.50, 584.60, 584.70, 584.80, 584.90, 585.00, 586.00, 587.00, 588.00, 588.10, 588.90, 591.00, 642.10, 642.20, 753.12, 753.13, 753.14, 753.15, 753.16, 753.17, 753.19, 753.20, 794.40 | A350   |
| Co-morbid diseases       |                                                                                                                                                                                                                                                                                                                                                                                                                                                                                                                                                                                                                                                        |        |
| Hypertension             | 401.x–405.x                                                                                                                                                                                                                                                                                                                                                                                                                                                                                                                                                                                                                                            | A269   |
| Diabetes mellitus        | 250.x                                                                                                                                                                                                                                                                                                                                                                                                                                                                                                                                                                                                                                                  | A181   |
| Hyperlipidemia           | 272.x                                                                                                                                                                                                                                                                                                                                                                                                                                                                                                                                                                                                                                                  | A189   |
| Coronary artery disease  | 410.x–414.x                                                                                                                                                                                                                                                                                                                                                                                                                                                                                                                                                                                                                                            | A279   |
| Congestive heart failure | 428.x                                                                                                                                                                                                                                                                                                                                                                                                                                                                                                                                                                                                                                                  | A289   |

|                                        |                     |      |
|----------------------------------------|---------------------|------|
| COPD                                   | 491.x, 492.x, 496.x | A325 |
| Peripheral artery occlusive<br>disease | 443.x–444.x         | A301 |
| Stroke                                 | 430.x–438.x         | A293 |

---

Abbreviations: COPD, chronic obstructive pulmonary disease; ICD-9-CM, International Classification of Disease, 9<sup>th</sup> Revision, Clinical Modification.
