# Supplementary material
Source: HighWire-hosted journal article supplement (https://bmjopen.bmj.com/content/7/12/e018483)
Supplement: inline-supplementary-material-2 [file inline-supplementary-material-2.pdf]

Table S2 Coding system for medication according to Anatomical Therapeutic Chemical code/Defined Daily Dose (ATC/DDD).

| Medications                                      | ATC/DDD codes                                                                                        |
|--------------------------------------------------|------------------------------------------------------------------------------------------------------|
| Diabetic drugs                                   | A10B, A10A                                                                                           |
| Antihypertensive drugs                           | C03, C09A, C09B, C09C, C09D, C02CA, C07A, C08C, C08D, C08E, C02AC01, C02CC02, C02AB01, C02AB02, C04A |
| Diuretics                                        | C03                                                                                                  |
| Angiotensin-converting enzyme inhibitors (ACEIs) | C09A, C09B                                                                                           |
| Angiotensinreceptor blockers (ARBs)              | C09C, C09D                                                                                           |
| Beta-blockers                                    | C07A                                                                                                 |
| Statins                                          | C10AA                                                                                                |
| Nonsteroidal anti-inflammatory drugs (NSAIDs)    | M01AA, M01AB, M01AC, M01AE, M01AG, M01AX                                                             |
| Analgesic drugs other than NSAIDs                | M01AH, N02BA01, N02BE01                                                                              |
| Selective serotonin reuptake inhibitors          | N06AB                                                                                                |
| Ergot alkaloids                                  | N02CA                                                                                                |
| Selective serotonin agonists                     | N02CC                                                                                                |
| Anti-epileptics                                  | Topiramate: N03AX11<br>Valproate: N03AG01                                                            |
| Tricyclic antidepressants                        | N06AA                                                                                                |
| Other anti-migraine drugs                        | N02CX                                                                                                |
