# Supplementary material
Source: HighWire-hosted journal article supplement (https://bmjopen.bmj.com/content/7/12/e018483)
Supplement: inline-supplementary-material-3 [file inline-supplementary-material-3.pdf]

Table S3 The propensity-score model results for the probability of migraine.

| Variables                         | Estimate | Odds ratio | 95% CI |       | p value |
|-----------------------------------|----------|------------|--------|-------|---------|
|                                   |          |            | Lower  | Upper |         |
| Monthly income, NTD               |          |            |        |       |         |
| <15840                            | —        | —          | —      | —     | —       |
| 15840-25000                       | 0.0949   | 1.159      | 1.104  | 1.217 | <0.0001 |
| ≥25000                            | -0.0421  | 1.011      | 0.955  | 1.07  | 0.0193  |
| Clinic visit frequency            | 0.9056   | 2.473      | 2.369  | 2.582 | <0.0001 |
| Number of Serum Creatinine test   | 0.0241   | 1.024      | 1.022  | 1.027 | <0.0001 |
| Comorbidities                     |          |            |        |       |         |
| Hypertension                      | -0.7048  | 0.494      | 0.457  | 0.535 | <0.0001 |
| Diabetes mellitus                 | -0.5794  | 0.56       | 0.48   | 0.654 | <0.0001 |
| Hyperlipidemia                    | -0.1309  | 0.877      | 0.805  | 0.956 | 0.003   |
| CAD                               | 0.1141   | 1.121      | 1.049  | 1.198 | 0.0007  |
| CHF                               | -0.7543  | 0.47       | 0.376  | 0.589 | <0.0001 |
| Stroke                            | 0.6756   | 1.965      | 1.794  | 2.153 | <0.0001 |
| COPD                              | -0.5297  | 0.589      | 0.542  | 0.64  | <0.0001 |
| PAOD                              | -0.4515  | 0.637      | 0.466  | 0.87  | 0.0046  |
| Urinary calculi                   | 0.1305   | 1.139      | 0.972  | 1.335 | 0.1069  |
| Medications                       |          |            |        |       |         |
| Anti-diabetic agents              | -0.4131  | 0.662      | 0.555  | 0.789 | <0.0001 |
| Diuretics                         | -0.7346  | 0.48       | 0.432  | 0.533 | <0.0001 |
| ACEIs or ARBs                     | -0.6299  | 0.533      | 0.483  | 0.587 | <0.0001 |
| Statins                           | -0.3653  | 0.694      | 0.614  | 0.785 | <0.0001 |
| Beta-blockers                     | 1.2972   | 3.659      | 3.437  | 3.896 | <0.0001 |
| NSAIDs                            | 1.0528   | 2.866      | 2.729  | 3.01  | <0.0001 |
| Analgesic drugs other than NSAIDs | 0.7442   | 2.105      | 1.986  | 2.231 | <0.0001 |

Abbreviations: ACEIs, angiotensin-converting-enzyme inhibitors; AF, atrial fibrillation; ARBs, angiotensin II receptor blockers; CAD, coronary artery disease; CHF, congestive heart failure; CI, confidence interval; COPD, chronic obstructive pulmonary disease; NSAIDs, non-steroidal anti-inflammatory drugs; NTD, new Taiwan dollars; PAOD, peripheral artery occlusive disease.
