# Supplementary material
Source: HighWire-hosted journal article supplement (https://bmjopen.bmj.com/content/7/12/e018483)
Supplement: inline-supplementary-material-6 [file inline-supplementary-material-6.pdf]

Table S4 Incidence and risk of CKD in patients with and without migraine before propensity score matching.

|                                 | Events | PY        | Incidence*            | Model 1 <sup>†</sup> |         | Model 2 <sup>‡</sup> |         | Model 3 <sup>§</sup> |         | Model 4 <sup>¶</sup> |         |
|---------------------------------|--------|-----------|-----------------------|----------------------|---------|----------------------|---------|----------------------|---------|----------------------|---------|
|                                 |        |           |                       | cHR (95% CI)         | p value | aHR (95% CI)         | p value | aHR (95% CI)         | p value | aHR (95% CI)         | p value |
| Control cohort<br>(n = 503,070) | 16,768 | 3,183,517 | 5.27<br>(5.19 - 5.35) | Reference            | –       | Reference            | –       | Reference            | –       | Reference            | –       |
| Migraine cohort<br>(n = 8,880)  | 446    | 70,842    | 6.3<br>(5.71 - 6.88)  | 1.22<br>(1.11-1.34)  | <0.001  | 1.51<br>(1.37-1.67)  | <0.001  | 1.34<br>(1.21-1.48)  | <0.001  | 1.35<br>(1.22-1.48)  | <0.001  |

Abbreviations: aHR, adjusted hazard ratio; cHR, crude hazard ratio; CI, confidence interval; CKD, chronic kidney disease; PY, person-years.

\*Incidence rate, per 1000 person-years.

<sup>†</sup>Model 1: crude model.

<sup>‡</sup>Model 2: adjusted for propensity score.

<sup>§</sup>Model 3: adjusted for all variables listed in Table 1.

<sup>¶</sup>Model 4: adjusted for all variables listed in Table 1, where medications were considered time-dependent covariates.
